# Supplementary material
Source: PubMed Central journal article supplement (PMC3517055)
Supplement: NIHMS416246-supplement-Supporting_Information.pdf [file NIHMS416246-supplement-Supporting_Information.pdf]

**Supplemental Table SI. SEQUEST Results for Proteins Identified in Tables I - IV.**

SEQUEST search

Database.uniprot\_sprot\_090305.fasta.hdr (3/5/2009); ipi.MOUSE\_090305.fasta

data were searched using both databases to confirm protein identifications and final ID's were cross-correlated with Swissprot accession numbers

Filter(s)... deltacn>=0.100 ; xc (± 1,2,3,4)=1.50,2.00,2.50,3.00 ; peptide probability<=5e-002 ; # distinct peptides>=2

Mods: (M\* +15.99492) C=160.03068

parent tolerance - 10 ppm; fragment tolerance - 0.5 amu

| Reference Scan(s)                  | Swiss Prot No. | Sequence                  | MH+     | z | P      | Sf   | Score | Coverage | Sp     |
|------------------------------------|----------------|---------------------------|---------|---|--------|------|-------|----------|--------|
|                                    |                |                           |         |   | P      | Sf   | XC    | DeltaCn  |        |
| Fructose-bisphosphate aldolase A   | P05064         |                           |         |   | 2e-008 | 2.5  | 30.2  | 0.0      | 0      |
| 6                                  |                | K.GILAADESTGSIK.R         | 1332.70 | 2 | 3e-008 | 0.89 | 3.783 | 0.150    | 893.2  |
| 16                                 |                | K.GILAADESTGSIK.R         | 1332.70 | 2 | 1e-007 | 0.94 | 4.052 | 0.105    | 1351.2 |
| 18                                 |                | K.IGEHTPSALAIM*ENANVLAR.Y | 2123.09 | 3 | 3e-006 | 0.89 | 4.231 | 0.341    | 858.7  |
| 24                                 |                | K.GILAADESTGSIK.R         | 1332.70 | 2 | 1e-007 | 0.94 | 4.133 | 0.177    | 1317.5 |
| 33                                 |                | K.GILAADESTGSIK.R         | 1332.70 | 2 | 2e-008 | 0.94 | 4.049 | 0.139    | 1361.4 |
| 36                                 |                | K.IGEHTPSALAIM*ENANVLAR.Y | 2123.09 | 3 | 6e-005 | 0.83 | 3.995 | 0.275    | 684.1  |
| 42                                 |                | K.GILAADESTGSIK.R         | 1332.70 | 2 | 3e-008 | 0.95 | 4.204 | 0.202    | 1341.5 |
| 45                                 |                | K.IGEHTPSALAIM*ENANVLAR.Y | 2123.09 | 3 | 0.001  | 0.90 | 4.074 | 0.379    | 949.8  |
| 49                                 |                | K.FSNEEIAM*ATVTALR.R      | 1668.83 | 2 | 4e-006 | 0.65 | 2.526 | 0.370    | 492.7  |
| 60                                 |                | K.FSNEEIAM*ATVTALR.R      | 1668.83 | 2 | 9e-005 | 0.68 | 2.593 | 0.503    | 376.4  |
| 65                                 |                | K.IGEHTPSALAIM*ENANVLAR.Y | 2123.09 | 3 | 0.002  | 0.84 | 3.876 | 0.356    | 645.5  |
| 71                                 |                | K.FSNEEIAM*ATVTALR.R      | 1668.83 | 2 | 4e-005 | 0.62 | 2.315 | 0.444    | 369.4  |
| 78                                 |                | K.FSNEEIAM*ATVTALR.R      | 1668.83 | 2 | 5e-006 | 0.82 | 2.749 | 0.542    | 580.9  |
| 83                                 |                | K.IGEHTPSALAIM*ENANVLAR.Y | 2123.09 | 3 | 0.0005 | 0.87 | 4.172 | 0.327    | 759.6  |
| 104                                |                | K.FSNEEIAM*ATVTALR.R      | 1668.83 | 3 | 0.001  | 0.89 | 3.040 | 0.601    | 667.1  |
| Superoxide dismutase 2             | P09671         |                           |         |   | 1e-006 | 1.6  | 20.2  | 0.0      | 0      |
| 5                                  |                | K.GDVTTQVALQPALK.F        | 1440.81 | 2 | 1e-006 | 0.89 | 3.482 | 0.419    | 695.8  |
| 15                                 |                | K.GDVTTQVALQPALK.F        | 1440.81 | 2 | 1e-005 | 0.89 | 3.586 | 0.452    | 640.8  |
| 24                                 |                | K.GDVTTQVALQPALK.F        | 1440.81 | 2 | 6e-006 | 0.80 | 3.164 | 0.353    | 572.2  |
| 33                                 |                | K.GDVTTQVALQPALK.F        | 1440.81 | 2 | 2e-006 | 0.84 | 3.197 | 0.351    | 660.3  |
| 41                                 |                | K.GDVTTQVALQPALK.F        | 1440.81 | 2 | 3e-006 | 0.91 | 3.474 | 0.441    | 784.9  |
| 96                                 |                | K.HHAAYVNNLNATEEK.Y       | 1710.82 | 3 | 0.03   | 0.75 | 2.739 | 0.393    | 586.4  |
| 173                                |                | K.GDVTTQVALQPALK.F        | 1440.81 | 3 | 0.03   | 0.83 | 2.837 | 0.559    | 774.9  |
| Aconitate hydratase, mitochondrial | Q99KI0         |                           |         |   | 8e-007 | 4.5  | 60.2  | 0.0      | 0      |
| 5                                  |                | K.SQFTITPGSEQIR.A         | 1463.75 | 2 | 0.03   | 0.30 | 2.006 | 0.352    | 228.5  |
| 6                                  |                | R.NAVTQEFQVPDPTAR.Y       | 1601.79 | 2 | 0.001  | 0.71 | 2.821 | 0.559    | 246.1  |
| 7                                  |                | K.IVYGHLDLDPANQEIER.G     | 1868.91 | 3 | 0.02   | 0.72 | 3.035 | 0.523    | 268.6  |
| 8                                  |                | R.DGYAQILR.D              | 935.49  | 2 | 0.001  | 0.84 | 2.478 | 0.269    | 694.6  |

|    |  |                       |         |   |        |      |       |       |        |
|----|--|-----------------------|---------|---|--------|------|-------|-------|--------|
| 14 |  | K.SQFTITPGSEQIR.A     | 1463.75 | 2 | 0.02   | 0.53 | 2.565 | 0.368 | 269.1  |
| 16 |  | R.NAVTQEFGPVPDTAR.Y   | 1601.79 | 2 | 0.0006 | 0.80 | 3.279 | 0.482 | 292.0  |
| 17 |  | K.IVYGHLDLDPANQEIER.G | 1868.91 | 3 | 0.002  | 0.86 | 3.659 | 0.562 | 367.3  |
| 18 |  | R.DGYAQILR.D          | 935.49  | 2 | 0.002  | 0.86 | 2.462 | 0.327 | 739.7  |
| 23 |  | K.IVYGHLDLDPANQEIER.G | 1868.91 | 3 | 0.0006 | 0.91 | 3.939 | 0.557 | 627.6  |
| 26 |  | R.DGYAQILR.D          | 935.49  | 2 | 0.001  | 0.88 | 2.506 | 0.279 | 822.9  |
| 32 |  | K.IVYGHLDLDPANQEIER.G | 1868.91 | 3 | 0.004  | 0.88 | 3.992 | 0.509 | 436.7  |
| 34 |  | R.DGYAQILR.D          | 935.49  | 2 | 0.001  | 0.76 | 2.355 | 0.275 | 582.8  |
| 35 |  | R.NAVTQEFGPVPDTAR.Y   | 1601.79 | 2 | 0.006  | 0.63 | 2.635 | 0.514 | 213.9  |
| 41 |  | K.IVYGHLDLDPANQEIER.G | 1868.91 | 3 | 0.001  | 0.78 | 3.312 | 0.479 | 350.9  |
| 43 |  | K.SQFTITPGSEQIR.A     | 1463.75 | 2 | 0.002  | 0.61 | 2.382 | 0.421 | 337.4  |
| 45 |  | R.DGYAQILR.D          | 935.49  | 2 | 0.001  | 0.85 | 2.714 | 0.245 | 734.2  |
| 49 |  | K.FKLEAPDADELPR.A     | 1500.77 | 3 | 8e-007 | 0.95 | 3.909 | 0.453 | 1386.5 |
| 50 |  | R.NAVTQEFGPVPDTAR.Y   | 1601.79 | 2 | 3e-005 | 0.77 | 2.887 | 0.591 | 268.8  |
| 56 |  | R.NAVTQEFGPVPDTAR.Y   | 1601.79 | 2 | 6e-005 | 0.67 | 2.588 | 0.568 | 237.9  |
| 59 |  | K.FKLEAPDADELPR.A     | 1500.77 | 3 | 0.003  | 0.68 | 2.611 | 0.423 | 544.8  |
| 74 |  | K.VAM*SHFEPSEYIR.Y    | 1581.74 | 3 | 0.0001 | 0.41 | 2.629 | 0.292 | 271.6  |
| 84 |  | K.FKLEAPDADELPR.A     | 1500.77 | 3 | 0.007  | 0.70 | 2.702 | 0.396 | 632.7  |
| 91 |  | K.FKLEAPDADELPR.A     | 1500.77 | 3 | 0.008  | 0.72 | 2.888 | 0.408 | 500.2  |

|               |        |                         |         |   |        |      |       |       |       |
|---------------|--------|-------------------------|---------|---|--------|------|-------|-------|-------|
| Alpha-enolase | P17182 |                         |         |   | 1e-005 | 0.8  | 20.1  | 0.0   | 0     |
| 67            |        | K.DATNVGDEGGFAPNILENK.E | 1960.92 | 2 | 0.003  | 0.48 | 2.200 | 0.576 | 206.3 |
| 78            |        | R.AAVPSGASTGIYEALRLR.D  | 1804.94 | 2 | 1e-005 | 0.43 | 2.314 | 0.465 | 55.4  |
| 128           |        | K.DATNVGDEGGFAPNILENK.E | 1960.92 | 2 | 0.003  | 0.36 | 2.110 | 0.538 | 169.7 |
| 185           |        | K.DATNVGDEGGFAPNILENK.E | 1960.92 | 3 | 0.001  | 0.40 | 2.625 | 0.321 | 304.1 |
| 246           |        | K.DATNVGDEGGFAPNILENK.E | 1960.92 | 3 | 0.004  | 0.50 | 2.728 | 0.479 | 206.3 |
| 254           |        | K.DATNVGDEGGFAPNILENK.E | 1960.92 | 3 | 0.05   | 0.60 | 2.834 | 0.425 | 384.7 |

|                                           |        |                     |         |   |        |      |       |       |       |
|-------------------------------------------|--------|---------------------|---------|---|--------|------|-------|-------|-------|
| ATP synthase subunit alpha, mitochondrial | Q03265 |                     |         |   | 1e-007 | 2.5  | 40.1  | 0.0   | 0     |
| 12                                        |        | K.AVDSLVPPIGR.G     | 1026.59 | 2 | 0.04   | 0.60 | 2.514 | 0.283 | 371.0 |
| 22                                        |        | R.ILGADTSVDLEETGR.V | 1575.79 | 2 | 0.0006 | 0.47 | 2.381 | 0.521 | 201.5 |
| 53                                        |        | K.AVDSLVPPIGR.G     | 1026.59 | 2 | 7e-005 | 0.62 | 2.238 | 0.264 | 460.7 |
| 65                                        |        | R.ILGADTSVDLEETGR.V | 1575.79 | 2 | 1e-007 | 0.80 | 2.740 | 0.513 | 579.0 |
| 71                                        |        | R.ILGADTSVDLEETGR.V | 1575.79 | 2 | 3e-007 | 0.90 | 2.811 | 0.672 | 781.5 |
| 81                                        |        | R.VVDALGNAIDGK.G    | 1171.63 | 2 | 0.02   | 0.56 | 2.156 | 0.479 | 348.9 |
| 84                                        |        | K.TGTAEM*SSILEER.I  | 1439.67 | 2 | 0.0004 | 0.53 | 2.102 | 0.539 | 357.1 |
| 89                                        |        | R.VVDALGNAIDGK.G    | 1171.63 | 2 | 0.01   | 0.53 | 2.073 | 0.387 | 361.1 |
| 95                                        |        | K.TGTAEM*SSILEER.I  | 1439.67 | 2 | 0.0009 | 0.72 | 2.425 | 0.558 | 394.6 |

|                                           |        |                  |         |   |        |      |       |       |        |
|-------------------------------------------|--------|------------------|---------|---|--------|------|-------|-------|--------|
| ATP synthase subunit alpha, mitochondrial | Q03265 |                  |         |   | 2e-007 | 2.9  | 40.2  | 0.0   | 0      |
| 3                                         |        | K.AVDSLVPPIGR.G  | 1026.59 | 2 | 0.02   | 0.60 | 2.337 | 0.332 | 386.6  |
| 4                                         |        | R.VLSIGDGIAR.V   | 1000.58 | 2 | 0.002  | 0.60 | 2.272 | 0.142 | 476.3  |
| 8                                         |        | R.VVDALGNAIDGK.G | 1171.63 | 2 | 3e-006 | 0.96 | 3.640 | 0.584 | 1075.6 |

|                                                |  |                       |         |   |        |      |       |       |        |
|------------------------------------------------|--|-----------------------|---------|---|--------|------|-------|-------|--------|
| 16                                             |  | R.VVDALGNAIDGK.G      | 1171.63 | 2 | 0.0003 | 0.91 | 3.161 | 0.478 | 789.0  |
| 25                                             |  | R.VVDALGNAIDGK.G      | 1171.63 | 2 | 0.0004 | 0.92 | 3.234 | 0.536 | 814.8  |
| 35                                             |  | R.VVDALGNAIDGK.G      | 1171.63 | 2 | 0.0002 | 0.76 | 2.680 | 0.414 | 521.5  |
| 44                                             |  | R.VVDALGNAIDGK.G      | 1171.63 | 2 | 0.003  | 0.75 | 2.533 | 0.462 | 435.2  |
| 51                                             |  | R.ILGADTSVDLEETGR.V   | 1575.79 | 2 | 8e-006 | 0.63 | 2.342 | 0.614 | 321.6  |
| 67                                             |  | R.ILGADTSVDLEETGR.V   | 1575.79 | 2 | 2e-007 | 0.70 | 2.371 | 0.642 | 449.0  |
| 83                                             |  | R.ILGADTSVDLEETGR.V   | 1575.79 | 2 | 4e-006 | 0.62 | 2.554 | 0.425 | 435.3  |
| ATP synthase subunit d, mitochondrial          |  | Q9DCX2                |         |   | 5e-007 | 2.2  | 30.2  | 0.0   | 0      |
| 18                                             |  | K.PGLVDDFEK.K         | 1019.50 | 2 | 0.0008 | 0.80 | 2.364 | 0.388 | 733.7  |
| 24                                             |  | R.ANVAKPGLVDDFEK.K    | 1502.78 | 3 | 0.0003 | 0.78 | 2.565 | 0.586 | 402.4  |
| 33                                             |  | R.ANVAKPGLVDDFEK.K    | 1502.78 | 3 | 0.02   | 0.62 | 2.593 | 0.567 | 210.8  |
| 53 - 57                                        |  | R.ANVAKPGLVDDFEKK.Y   | 1630.88 | 3 | 5e-007 | 0.84 | 3.105 | 0.483 | 555.7  |
| 99                                             |  | K.PGLVDDFEK.K         | 1019.50 | 2 | 0.001  | 0.83 | 2.422 | 0.504 | 634.7  |
| 124                                            |  | K.PGLVDDFEK.K         | 1019.50 | 2 | 0.0007 | 0.77 | 2.011 | 0.463 | 639.5  |
| 186                                            |  | K.PGLVDDFEK.K         | 1019.50 | 2 | 0.0002 | 0.62 | 2.053 | 0.371 | 507.4  |
| 194                                            |  | K.PGLVDDFEK.K         | 1019.50 | 2 | 0.001  | 0.72 | 2.098 | 0.332 | 690.6  |
| 245                                            |  | R.ANVAKPGLVDDFEKK.Y   | 1630.88 | 3 | 0.0003 | 0.44 | 2.546 | 0.445 | 188.4  |
| Calbindin                                      |  | P12658                |         |   | 0.0002 | 1.7  | 20.1  | 0.0   | 0      |
| 8                                              |  | K.LAEYDLM*LK.L        | 1212.62 | 2 | 0.0002 | 0.83 | 2.382 | 0.518 | 613.5  |
| 9                                              |  | K.SFVDQYGQR.D         | 1099.52 | 2 | 0.0006 | 0.84 | 2.235 | 0.484 | 636.1  |
| 18                                             |  | K.SFVDQYGQR.D         | 1099.52 | 2 | 0.01   | 0.67 | 2.080 | 0.455 | 412.5  |
| 52                                             |  | K.SFVDQYGQR.D         | 1099.52 | 2 | 0.002  | 0.64 | 2.218 | 0.231 | 515.7  |
| 67                                             |  | K.LAEYDLM*LK.L        | 1212.62 | 2 | 0.0003 | 0.86 | 2.506 | 0.559 | 679.0  |
| Cytochrome c oxidase subunit 5A, mitochondrial |  | P12787                |         |   | 2e-005 | 2.3  | 30.2  | 0.0   | 0      |
| 4                                              |  | R.LNDFASAVR.I         | 992.52  | 2 | 6e-005 | 0.83 | 2.725 | 0.230 | 662.4  |
| 7                                              |  | K.GM*NTLVGYDLVPEPK.I  | 1648.83 | 2 | 0.001  | 0.72 | 2.832 | 0.523 | 345.8  |
| 14                                             |  | R.LNDFASAVR.I         | 992.52  | 2 | 2e-005 | 0.89 | 3.056 | 0.222 | 812.2  |
| 23                                             |  | R.LNDFASAVR.I         | 992.52  | 2 | 3e-005 | 0.92 | 3.196 | 0.242 | 993.0  |
| 32                                             |  | R.LNDFASAVR.I         | 992.52  | 2 | 0.0004 | 0.91 | 2.901 | 0.264 | 979.0  |
| 34                                             |  | K.GM*NTLVGYDLVPEPK.I  | 1648.83 | 2 | 2e-005 | 0.83 | 3.054 | 0.464 | 483.4  |
| 56                                             |  | R.LNDFASAVR.I         | 992.52  | 2 | 0.0008 | 0.92 | 3.175 | 0.208 | 1069.5 |
| 85                                             |  | R.KGM*NTLVGYDLVPEPK.I | 1776.92 | 3 | 0.002  | 0.64 | 2.576 | 0.513 | 302.8  |
| Fructose-bisphosphate aldolase C               |  | P05063                |         |   | 3e-008 | 3.3  | 40.2  | 0.0   | 0      |
| 4                                              |  | K.GILAADESVM*AK.R     | 1364.67 | 2 | 6e-008 | 0.96 | 4.384 | 0.175 | 1708.1 |
| 7                                              |  | R.DNAGAATEEFIK.R      | 1265.60 | 2 | 1e-005 | 0.95 | 3.443 | 0.517 | 1070.8 |
| 9                                              |  | R.LSQIGVENTEENR.R     | 1488.73 | 2 | 5e-006 | 0.84 | 2.723 | 0.418 | 677.3  |
| 13                                             |  | K.GILAADESVM*AK.R     | 1364.67 | 2 | 3e-008 | 0.96 | 4.638 | 0.116 | 1825.9 |
| 15                                             |  | R.DNAGAATEEFIK.R      | 1265.60 | 2 | 2e-006 | 0.90 | 3.251 | 0.438 | 729.7  |
| 16                                             |  | R.QVLFSADDR.V         | 1050.52 | 2 | 0.002  | 0.69 | 2.085 | 0.496 | 211.2  |

|                                          |  |                     |         |   |        |      |       |       |        |
|------------------------------------------|--|---------------------|---------|---|--------|------|-------|-------|--------|
| 22                                       |  | K.GILAADESVGSM*AK.R | 1364.67 | 2 | 8e-008 | 0.96 | 4.546 | 0.173 | 1872   |
| 24                                       |  | R.DNAGAATEEFIK.R    | 1265.60 | 2 | 8e-005 | 0.84 | 3.188 | 0.442 | 564.2  |
| 31                                       |  | K.GILAADESVGSM*AK.R | 1364.67 | 2 | 2e-006 | 0.93 | 4.376 | 0.167 | 1241.1 |
| 33                                       |  | R.QVLFSADDR.V       | 1050.52 | 2 | 0.006  | 0.41 | 2.002 | 0.281 | 165.9  |
| 34                                       |  | R.DNAGAATEEFIK.R    | 1265.60 | 2 | 7e-005 | 0.82 | 3.095 | 0.410 | 519.8  |
| 40                                       |  | K.GILAADESVGSM*AK.R | 1364.67 | 2 | 4e-006 | 0.74 | 3.138 | 0.126 | 775.7  |
| 42                                       |  | R.DNAGAATEEFIK.R    | 1265.60 | 2 | 2e-005 | 0.62 | 2.274 | 0.487 | 388.0  |
| 62 - 84                                  |  | R.LSQIGVENTEENR.R   | 1488.73 | 2 | 9e-007 | 0.80 | 2.819 | 0.395 | 544.5  |
| Glyceraldehyde-3-phosphate dehydrogenase |  | P16858              |         |   | 1e-007 | 2.6  | 30.2  | 0.0   | 0      |
| 41                                       |  | R.VVDLM*AYM*ASK.-   | 1259.60 | 2 | 1e-006 | 0.96 | 3.582 | 0.543 | 1117.2 |
| 44                                       |  | R.VVDLM*AYM*ASKE.-  | 1388.64 | 2 | 3e-007 | 0.95 | 3.617 | 0.581 | 1083.9 |
| 46                                       |  | K.PITIFQER.D        | 1003.56 | 2 | 0.0003 | 0.67 | 2.243 | 0.354 | 312.9  |
| 49                                       |  | R.VVDLM*AYM*ASK.-   | 1259.60 | 2 | 3e-006 | 0.96 | 3.536 | 0.541 | 1092.9 |
| 51                                       |  | R.VVDLM*AYM*ASKE.-  | 1388.64 | 2 | 1e-007 | 0.97 | 3.666 | 0.493 | 1653.4 |
| 58                                       |  | R.VVDLM*AYM*ASK.-   | 1259.60 | 2 | 4e-007 | 0.96 | 3.719 | 0.558 | 1254.4 |
| 61                                       |  | R.VVDLM*AYM*ASKE.-  | 1388.64 | 2 | 7e-007 | 0.97 | 4.016 | 0.553 | 1317.2 |
| 67                                       |  | R.VVDLM*AYM*ASK.-   | 1259.60 | 2 | 2e-007 | 0.97 | 3.920 | 0.612 | 1330.8 |
| 70                                       |  | R.VVDLM*AYM*ASKE.-  | 1388.64 | 2 | 6e-006 | 0.97 | 4.103 | 0.549 | 1402.7 |
| 77                                       |  | R.VVDLM*AYM*ASKE.-  | 1388.64 | 2 | 7e-007 | 0.96 | 3.852 | 0.519 | 1295.2 |
| 87                                       |  | K.PITIFQER.D        | 1003.56 | 2 | 0.0002 | 0.70 | 2.389 | 0.353 | 321.8  |
| Heat shock protein HSP 90-alpha          |  | P07901              |         |   | 2e-007 | 3.2  | 34.2  | 0.0   | 0      |
| 4                                        |  | -.TLTIVDTGIGM*TK.-  | 1365.73 | 2 | 4e-006 | 0.91 | 3.354 | 0.280 | 1090.4 |
| 9                                        |  | K.ADLINNLGTIAK.S    | 1242.71 | 2 | 2e-006 | 0.72 | 2.681 | 0.254 | 531.9  |
| 17                                       |  | -.GVVDESDLPLNISR.-  | 1513.79 | 2 | 2e-005 | 0.88 | 3.559 | 0.193 | 770.2  |
| 25                                       |  | K.ADLINNLGTIAK.S    | 1242.71 | 2 | 2e-006 | 0.88 | 3.430 | 0.356 | 671.2  |
| 26                                       |  | -.GVVDESDLPLNISR.-  | 1513.79 | 2 | 0.001  | 0.84 | 3.698 | 0.170 | 667.6  |
| 34                                       |  | K.ADLINNLGTIAK.S    | 1242.71 | 2 | 3e-007 | 0.90 | 3.168 | 0.390 | 798.3  |
| 36                                       |  | -.GVVDESDLPLNISR.-  | 1513.79 | 2 | 2e-007 | 0.88 | 3.411 | 0.304 | 744.2  |
| 43                                       |  | -.GVVDESDLPLNISR.-  | 1513.79 | 2 | 5e-006 | 0.90 | 3.618 | 0.241 | 811.6  |
| 44                                       |  | K.ADLINNLGTIAK.S    | 1242.71 | 2 | 3e-007 | 0.78 | 2.970 | 0.289 | 545.7  |
| 49                                       |  | K.ADLINNLGTIAK.S    | 1242.71 | 2 | 4e-007 | 0.89 | 3.360 | 0.305 | 807.0  |
| 50                                       |  | -.GVVDESDLPLNISR.-  | 1513.79 | 2 | 3e-005 | 0.87 | 3.532 | 0.242 | 730.6  |
| 111                                      |  | K.DQVANSAFVER.L     | 1235.60 | 2 | 0.02   | 0.49 | 2.074 | 0.399 | 396.6  |
| Synaptosomal-associated protein 25-A     |  | P60879              |         |   | 2e-006 | 2.4  | 30.2  | 0.0   | 0      |
| 5                                        |  | R.TLVM*LDEQGEQLER.I | 1676.82 | 2 | 5e-006 | 0.65 | 2.719 | 0.281 | 340.4  |
| 18                                       |  | R.TLVM*LDEQGEQLER.I | 1676.82 | 2 | 2e-006 | 0.89 | 3.322 | 0.399 | 604.1  |
| 45                                       |  | R.TLVM*LDEQGEQLER.I | 1676.82 | 2 | 2e-006 | 0.90 | 3.515 | 0.406 | 577.4  |
| 50                                       |  | R.TLVM*LDEQGEQLER.I | 1676.82 | 2 | 0.0001 | 0.85 | 3.344 | 0.427 | 443.1  |
| 53                                       |  | R.M*LQLVEESK.D      | 1092.56 | 2 | 0.02   | 0.65 | 2.154 | 0.334 | 362.6  |
| 57                                       |  | R.TLVM*LDEQGEQLER.I | 1676.82 | 2 | 7e-005 | 0.87 | 3.399 | 0.478 | 428.1  |

|                                          |        |                                  |         |   |        |      |       |       |        |
|------------------------------------------|--------|----------------------------------|---------|---|--------|------|-------|-------|--------|
| 68                                       |        | R.M*LQLVEESK.D                   | 1092.56 | 2 | 0.006  | 0.83 | 2.177 | 0.362 | 659.1  |
| 84                                       |        | -.M*LQLVEESK.-                   | 1092.56 | 2 | 0.04   | 0.68 | 2.116 | 0.314 | 550.6  |
| 93                                       |        | R.M*LQLVEESK.D                   | 1092.56 | 2 | 0.05   | 0.63 | 2.299 | 0.231 | 437.9  |
| Glutamate dehydrogenase 1, mitochondrial | P26443 |                                  |         |   | 3e-005 | 6.4  | 80.1  | 0.0   | 0      |
| 16                                       |        | R.YSTDVSVDEVK.A                  | 1241.59 | 2 | 0.001  | 0.88 | 2.490 | 0.707 | 407.2  |
| 24                                       |        | K.HGGTIPVVPTAEFQDR.I             | 1723.88 | 3 | 0.008  | 0.75 | 2.758 | 0.380 | 573.9  |
| 27                                       |        | K.YNLGLDLR.T                     | 963.53  | 2 | 0.0001 | 0.93 | 2.730 | 0.457 | 969.7  |
| 35                                       |        | R.YSTDVSVDEVK.A                  | 1241.59 | 2 | 3e-005 | 0.84 | 2.430 | 0.605 | 341.8  |
| 36                                       |        | K.YNLGLDLR.T                     | 963.53  | 2 | 9e-005 | 0.94 | 2.621 | 0.603 | 928.9  |
| 43                                       |        | R.YSTDVSVDEVK.A                  | 1241.59 | 2 | 0.02   | 0.85 | 2.624 | 0.600 | 424.6  |
| 44 - 47                                  |        | K.YNLGLDLR.T                     | 963.53  | 2 | 0.0008 | 0.94 | 2.952 | 0.561 | 978.0  |
| 48                                       |        | R.YSTDVSVDEVK.A                  | 1241.59 | 2 | 0.002  | 0.86 | 2.386 | 0.635 | 425.4  |
| 52                                       |        | R.TAAYVNAIEK.V                   | 1079.57 | 2 | 0.007  | 0.88 | 2.526 | 0.613 | 548.7  |
| 54                                       |        | R.DSNYHLLM*SVQESLER.K            | 1936.91 | 3 | 0.004  | 0.42 | 2.557 | 0.320 | 282.2  |
| 58                                       |        | K.YNLGLDLR.T                     | 963.53  | 2 | 0.0001 | 0.94 | 2.874 | 0.594 | 954.6  |
| 60                                       |        | R.TAAYVNAIEK.V                   | 1079.57 | 2 | 6e-005 | 0.93 | 2.852 | 0.599 | 763.3  |
| 67                                       |        | R.TAAYVNAIEK.V                   | 1079.57 | 2 | 0.02   | 0.92 | 2.657 | 0.562 | 818.3  |
| 69                                       |        | K.DIVHSGLAYTM*ER.S               | 1507.72 | 3 | 0.002  | 0.91 | 2.794 | 0.476 | 1381.1 |
| 77                                       |        | R.TAAYVNAIEK.V                   | 1079.57 | 2 | 0.04   | 0.87 | 2.638 | 0.558 | 550.6  |
| 80                                       |        | R.DSNYHLLM*SVQESLER.K            | 1936.91 | 3 | 0.001  | 0.50 | 2.591 | 0.381 | 274.4  |
| 83                                       |        | R.TAAYVNAIEK.V                   | 1079.57 | 2 | 0.008  | 0.86 | 2.652 | 0.627 | 438.9  |
| 88                                       |        | K.CAVVDVPPFGGAK.A                | 1219.61 | 2 | 0.03   | 0.87 | 2.846 | 0.458 | 795.7  |
| 133                                      |        | R.DDGSWEVIEGYR.A                 | 1425.63 | 2 | 4e-005 | 0.73 | 2.187 | 0.704 | 441.6  |
| 142                                      |        | R.DDGSWEVIEGYR.A                 | 1425.63 | 2 | 4e-005 | 0.69 | 2.321 | 0.539 | 408.2  |
| 165                                      |        | R.DDGSWEVIEGYR.A                 | 1425.63 | 2 | 0.0008 | 0.78 | 2.146 | 0.706 | 494.1  |
| Cofilin 1                                | P18760 |                                  |         |   | 2e-009 | 2.7  | 40.2  | 0.0   | 0      |
| 9                                        |        | K.LGGSAVISLEGKPL.-               | 1340.78 | 2 | 0.0003 | 0.83 | 3.056 | 0.382 | 566.0  |
| 18                                       |        | R.YALYDATYETK.E                  | 1337.63 | 2 | 0.0003 | 0.83 | 2.978 | 0.475 | 494.1  |
| 27                                       |        | K.LGGSAVISLEGKPL.-               | 1340.78 | 2 | 0.007  | 0.63 | 2.073 | 0.363 | 463.4  |
| 47                                       |        | K.LGGSAVISLEGKPL.-               | 1340.78 | 2 | 0.005  | 0.52 | 2.185 | 0.391 | 316.1  |
| 50                                       |        | R.YALYDATYETK.E                  | 1337.63 | 2 | 0.0004 | 0.82 | 2.672 | 0.429 | 578.9  |
| 55                                       |        | K.NIILEEGKEILVGDVGQTVDDPYTTFVK.M | 3092.60 | 3 | 1e-008 | 0.94 | 4.814 | 0.554 | 828.8  |
| 59                                       |        | K.LGGSAVISLEGKPL.-               | 1340.78 | 2 | 0.01   | 0.32 | 2.003 | 0.294 | 275.9  |
| 64                                       |        | K.NIILEEGKEILVGDVGQTVDDPYTTFVK.M | 3092.60 | 3 | 2e-009 | 0.88 | 3.706 | 0.565 | 579.0  |
| 69                                       |        | R.YALYDATYETK.E                  | 1337.63 | 2 | 0.0001 | 0.67 | 2.364 | 0.350 | 435.9  |
| 86                                       |        | R.YALYDATYETK.E                  | 1337.63 | 2 | 0.0003 | 0.75 | 2.802 | 0.317 | 514.8  |
| 100                                      |        | K.NIILEEGKEILVGDVGQTVDDPYTTFVK.M | 3092.60 | 3 | 5e-007 | 0.87 | 3.565 | 0.585 | 532.8  |
| 125                                      |        | K.NIILEEGKEILVGDVGQTVDDPYTTFVK.M | 3092.60 | 3 | 2e-005 | 0.59 | 2.833 | 0.372 | 288.3  |
| 130                                      |        | R.YALYDATYETK.E                  | 1337.63 | 2 | 0.0004 | 0.85 | 2.819 | 0.441 | 611.9  |
| 274                                      |        | K.EILVGDVGQTVDDPYTTFVK.M         | 2196.11 | 2 | 0.0008 | 0.31 | 2.145 | 0.446 | 161.7  |

|                                           |        |                          |         |        |        |      |       |       |        |
|-------------------------------------------|--------|--------------------------|---------|--------|--------|------|-------|-------|--------|
| Cofilin 1                                 | P18760 |                          |         | 6e-006 | 2.1    | 30.2 | 0.0   | 0     |        |
| 8                                         |        | R.FDAGELITQR.E           | 1149.59 | 2      | 0.0001 | 0.97 | 3.807 | 0.368 | 1871.1 |
| 16                                        |        | R.FDAGELITQR.E           | 1149.59 | 2      | 6e-006 | 0.94 | 3.082 | 0.322 | 1308.2 |
| 27                                        |        | R.FDAGELITQR.E           | 1149.59 | 2      | 0.0002 | 0.86 | 2.626 | 0.337 | 913.6  |
| 35                                        |        | R.FDAGELITQR.E           | 1149.59 | 2      | 0.0005 | 0.87 | 2.729 | 0.266 | 978.2  |
| 53                                        |        | R.FDAGELITQR.E           | 1149.59 | 2      | 0.003  | 0.92 | 3.181 | 0.257 | 1259   |
| 87                                        |        | R.IYTSIGEDYDER.V         | 1460.65 | 2      | 0.002  | 0.54 | 2.017 | 0.570 | 243.8  |
| 102                                       |        | K.AAELIANSLATAGDGLIELR.K | 1998.09 | 3      | 0.01   | 0.67 | 3.012 | 0.403 | 488.1  |
| 115                                       |        | K.AAELIANSLATAGDGLIELR.K | 1998.09 | 3      | 0.04   | 0.61 | 2.815 | 0.375 | 461.7  |
| 131                                       |        | K.AAELIANSLATAGDGLIELR.K | 1998.09 | 3      | 0.007  | 0.67 | 2.964 | 0.336 | 545.7  |
| ATP synthase subunit alpha, mitochondrial | Q03265 |                          |         | 2e-006 | 2.6    | 42.1 | 0.0   | 0     |        |
| 7                                         |        | R.VVDALGNAIDGK.G         | 1171.63 | 2      | 0.0008 | 0.83 | 2.574 | 0.526 | 546.7  |
| 9                                         |        | K.AVDSLVPPIGR.G          | 1026.59 | 2      | 0.01   | 0.48 | 2.152 | 0.339 | 344.8  |
| 10                                        |        | R.ILGADTSVDLEETGR.V      | 1575.79 | 2      | 5e-006 | 0.59 | 2.327 | 0.552 | 331.5  |
| 16                                        |        | R.VVDALGNAIDGK.G         | 1171.63 | 2      | 0.0009 | 0.91 | 2.923 | 0.490 | 831.0  |
| 19                                        |        | R.ILGADTSVDLEETGR.V      | 1575.79 | 2      | 0.0002 | 0.73 | 2.395 | 0.584 | 438.2  |
| 25                                        |        | R.VVDALGNAIDGK.G         | 1171.63 | 2      | 0.0006 | 0.91 | 2.877 | 0.526 | 797.3  |
| 26                                        |        | -.TSIAIDTIINQK.-         | 1316.74 | 2      | 0.002  | 0.19 | 2.205 | -     | 353.2  |
| 27                                        |        | K.TGTAEM*SSILEER.I       | 1439.67 | 2      | 0.0006 | 0.38 | 2.027 | 0.425 | 266.3  |
| 34                                        |        | R.VVDALGNAIDGK.G         | 1171.63 | 2      | 0.03   | 0.87 | 2.980 | 0.420 | 684.1  |
| 37                                        |        | R.ILGADTSVDLEETGR.V      | 1575.79 | 2      | 2e-006 | 0.65 | 2.324 | 0.532 | 414.7  |
| 43                                        |        | R.VVDALGNAIDGK.G         | 1171.63 | 2      | 0.006  | 0.89 | 2.881 | 0.523 | 670.7  |
| 46                                        |        | K.TGTAEM*SSILEER.I       | 1439.67 | 2      | 0.0003 | 0.50 | 2.076 | 0.523 | 318.9  |
| 53                                        |        | K.TGTAEM*SSILEER.I       | 1439.67 | 2      | 7e-005 | 0.51 | 2.317 | 0.515 | 225.5  |
| 54 - 57                                   |        | R.ILGADTSVDLEETGR.V      | 1575.79 | 2      | 3e-006 | 0.73 | 2.720 | 0.442 | 543.1  |
| 61                                        |        | K.TGTAEM*SSILEER.I       | 1439.67 | 2      | 4e-006 | 0.44 | 2.117 | 0.477 | 242.8  |
| 79                                        |        | -.TSIAIDTIINQK.-         | 1316.74 | 2      | 0.02   | 0.46 | 2.235 | -     | 514.4  |
| 86                                        |        | -.TSIAIDTIINQK.-         | 1316.74 | 2      | 0.007  | 0.18 | 2.071 | -     | 286.9  |
| Cytochrome c oxidase, subunit 5A          | P12787 |                          |         | 5e-008 | 2.3    | 30.2 | 16.4  | 0     |        |
| 7                                         |        | R.LNDFASAVR.I            | 992.52  | 2      | 4e-005 | 0.89 | 2.965 | 0.312 | 711.6  |
| 9                                         |        | K.GM*NTLVGYDLVPEPK.I     | 1648.83 | 2      | 1e-005 | 0.91 | 3.694 | 0.530 | 647.1  |
| 14                                        |        | R.LNDFASAVR.I            | 992.52  | 2      | 2e-005 | 0.84 | 2.796 | 0.249 | 644.7  |
| 17                                        |        | K.GM*NTLVGYDLVPEPK.I     | 1648.83 | 2      | 5e-008 | 0.92 | 3.657 | 0.495 | 764.3  |
| 24                                        |        | R.LNDFASAVR.I            | 992.52  | 2      | 7e-005 | 0.86 | 3.104 | 0.232 | 665.9  |
| 27                                        |        | K.GM*NTLVGYDLVPEPK.I     | 1648.83 | 2      | 6e-005 | 0.85 | 3.181 | 0.484 | 528.7  |
| 34                                        |        | R.LNDFASAVR.I            | 992.52  | 2      | 0.0003 | 0.89 | 3.158 | 0.204 | 816.9  |
| 36                                        |        | K.GM*NTLVGYDLVPEPK.I     | 1648.83 | 2      | 1e-005 | 0.82 | 3.081 | 0.493 | 485.4  |
| 43                                        |        | R.LNDFASAVR.I            | 992.52  | 2      | 0.0008 | 0.89 | 3.170 | 0.234 | 797.3  |
| 45                                        |        | K.GM*NTLVGYDLVPEPK.I     | 1648.83 | 2      | 2e-006 | 0.89 | 3.092 | 0.566 | 640.5  |
| 68                                        |        | R.KGM*NTLVGYDLVPEPK.I    | 1776.92 | 3      | 0.0002 | 0.56 | 2.540 | 0.411 | 318.0  |

## Dynammin 1

P39053

|     |  |                      |         |   | 2e-009 | 9.1  | 108.2 | 0.0   | 0      |
|-----|--|----------------------|---------|---|--------|------|-------|-------|--------|
| 8   |  | K.SSVLENFVGR.D       | 1107.58 | 2 | 0.0002 | 0.62 | 2.357 | 0.154 | 615.3  |
| 9   |  | K.VPVGDQPPDIEFQIR.D  | 1709.89 | 2 | 8e-006 | 0.57 | 2.486 | 0.431 | 266.8  |
| 17  |  | K.SSVLENFVGR.D       | 1107.58 | 2 | 0.0002 | 0.76 | 2.582 | 0.212 | 676.5  |
| 18  |  | K.VPVGDQPPDIEFQIR.D  | 1709.89 | 2 | 0.0006 | 0.72 | 2.676 | 0.444 | 353.6  |
| 25  |  | -.LQSQLLSIEK.-       | 1158.67 | 2 | 0.05   | 0.49 | 2.013 | 0.188 | 344.9  |
| 27  |  | K.SSVLENFVGR.D       | 1107.58 | 2 | 6e-005 | 0.83 | 2.684 | 0.166 | 897.1  |
| 36  |  | R.NLVDSYM*AIVNK.T    | 1382.70 | 2 | 0.0009 | 0.81 | 2.809 | 0.466 | 489.3  |
| 45  |  | R.NLVDSYM*AIVNK.T    | 1382.70 | 2 | 8e-005 | 0.91 | 3.054 | 0.467 | 720.9  |
| 51  |  | K.VPVGDQPPDIEFQIR.D  | 1709.89 | 2 | 4e-007 | 0.87 | 3.132 | 0.476 | 497.8  |
| 54  |  | K.DITAALAAER.K       | 1030.55 | 2 | 0.0001 | 0.96 | 3.390 | 0.354 | 1673.2 |
| 58  |  | K.VPVGDQPPDIEFQIR.D  | 1709.89 | 2 | 0.0005 | 0.52 | 2.321 | 0.423 | 265.5  |
| 60  |  | R.NLVDSYM*AIVNK.T    | 1382.70 | 2 | 2e-006 | 0.93 | 3.226 | 0.555 | 792.3  |
| 62  |  | R.GM*EDLIPLVNR.L     | 1272.66 | 2 | 0.0002 | 0.87 | 2.654 | 0.593 | 445.2  |
| 67  |  | R.GM*EDLIPLVNR.L     | 1272.66 | 2 | 0.001  | 0.68 | 2.422 | 0.427 | 290.7  |
| 70  |  | K.VPVGDQPPDIEFQIR.D  | 1709.89 | 2 | 8e-009 | 0.90 | 3.362 | 0.526 | 602.9  |
| 71  |  | R.NLVDSYM*AIVNK.T    | 1382.70 | 2 | 0.002  | 0.87 | 2.987 | 0.511 | 583.7  |
| 76  |  | R.GM*EDLIPLVNR.L     | 1272.66 | 2 | 0.0002 | 0.74 | 2.544 | 0.472 | 325.6  |
| 77  |  | R.NLVDSYM*AIVNK.T    | 1382.70 | 2 | 8e-005 | 0.90 | 3.102 | 0.500 | 655.1  |
| 80  |  | K.TSGNQDEILVIR.K     | 1344.71 | 2 | 2e-005 | 0.62 | 2.576 | 0.337 | 333.5  |
| 81  |  | K.DITAALAAER.K       | 1030.55 | 2 | 0.0003 | 0.95 | 3.249 | 0.376 | 1476   |
| 86  |  | K.DITAALAAER.K       | 1030.55 | 2 | 0.001  | 0.96 | 3.223 | 0.385 | 1684.4 |
| 88  |  | K.TSGNQDEILVIR.K     | 1344.71 | 2 | 7e-005 | 0.85 | 3.005 | 0.367 | 555.3  |
| 96  |  | K.TSGNQDEILVIR.K     | 1344.71 | 2 | 0.0001 | 0.75 | 2.926 | 0.338 | 409.4  |
| 99  |  | R.DM*LM*QFVTK.E      | 1144.54 | 2 | 0.004  | 0.88 | 2.576 | 0.241 | 950.7  |
| 105 |  | K.DITAALAAER.K       | 1030.55 | 2 | 0.0002 | 0.94 | 3.135 | 0.299 | 1399.5 |
| 106 |  | K.ALLQM*VQQFAVDFEK.R | 1782.91 | 2 | 1e-007 | 0.90 | 3.031 | 0.614 | 474.1  |
| 107 |  | K.LDLM*DEGTDAR.D     | 1251.55 | 2 | 3e-006 | 0.78 | 2.375 | 0.368 | 535.7  |
| 108 |  | K.TSGNQDEILVIR.K     | 1344.71 | 2 | 4e-005 | 0.77 | 2.648 | 0.348 | 499.3  |
| 112 |  | K.TSGNQDEILVIR.K     | 1344.71 | 2 | 0.0002 | 0.69 | 2.652 | 0.313 | 414.6  |
| 113 |  | K.LDLM*DEGTDAR.D     | 1251.55 | 2 | 0.003  | 0.66 | 2.453 | 0.348 | 373.2  |
| 114 |  | R.DM*LM*QFVTK.E      | 1144.54 | 2 | 0.001  | 0.88 | 2.601 | 0.272 | 870.5  |
| 120 |  | K.SSVLENFVGR.D       | 1107.58 | 2 | 0.0004 | 0.79 | 2.356 | 0.185 | 843.6  |
| 123 |  | K.DITAALAAER.K       | 1030.55 | 2 | 3e-005 | 0.95 | 3.218 | 0.357 | 1521.5 |
| 124 |  | R.DM*LM*QFVTK.E      | 1144.54 | 2 | 0.03   | 0.85 | 2.363 | 0.302 | 854.9  |
| 140 |  | K.LDLM*DEGTDAR.D     | 1251.55 | 2 | 0.0002 | 0.67 | 2.326 | 0.406 | 370.9  |
| 146 |  | K.SSVLENFVGR.D       | 1107.58 | 2 | 3e-005 | 0.81 | 2.531 | 0.170 | 882.0  |
| 147 |  | K.LDLM*DEGTDAR.D     | 1251.55 | 2 | 0.009  | 0.57 | 2.097 | 0.327 | 379.5  |
| 150 |  | K.ALLQM*VQQFAVDFEK.R | 1782.91 | 2 | 2e-009 | 0.96 | 3.965 | 0.601 | 933.3  |
| 156 |  | K.ALLQM*VQQFAVDFEK.R | 1782.91 | 2 | 8e-005 | 0.82 | 2.884 | 0.532 | 365.6  |
| 165 |  | K.ALLQM*VQQFAVDFEK.R | 1782.91 | 2 | 4e-006 | 0.91 | 3.347 | 0.608 | 521.1  |
| 178 |  | K.ALLQM*VQQFAVDFEK.R | 1782.91 | 3 | 2e-008 | 0.82 | 3.392 | 0.220 | 922.3  |
| 191 |  | R.DM*LM*QFVTK.E      | 1144.54 | 2 | 0.005  | 0.84 | 2.430 | 0.274 | 772.5  |

|                                       |        |                                  |         |   |        |      |       |       |        |
|---------------------------------------|--------|----------------------------------|---------|---|--------|------|-------|-------|--------|
| 203                                   |        | K.ALLQM*VQQFAVDFEK.R             | 1782.91 | 3 | 8e-005 | 0.57 | 2.895 | 0.161 | 574.7  |
| 211                                   |        | R.DM*LM*QFVTK.E                  | 1144.54 | 2 | 0.01   | 0.88 | 2.601 | 0.215 | 986.7  |
| 212                                   |        | R.LQDAFSAIQNADLDLPQIAVVGGQSAGK.S | 2883.48 | 3 | 5e-006 | 0.87 | 3.781 | 0.585 | 458.5  |
| 215                                   |        | K.ALLQM*VQQFAVDFEK.R             | 1782.91 | 3 | 1e-008 | 0.85 | 3.360 | 0.308 | 945.2  |
| 235                                   |        | R.LQDAFSAIQNADLDLPQIAVVGGQSAGK.S | 2883.48 | 3 | 0.0002 | 0.58 | 2.868 | 0.362 | 306.9  |
| Glutamine synthetase                  | P15105 |                                  |         |   | 0.001  | 1.4  | 18.2  | 0.0   | 0      |
| 49                                    |        | R.LTGFHETSININDFSAGVANR.G        | 2150.03 | 3 | 0.001  | 0.73 | 3.135 | 0.524 | 331.3  |
| 58                                    |        | R.LTGFHETSININDFSAGVANR.G        | 2150.03 | 3 | 0.006  | 0.89 | 3.841 | 0.568 | 715.8  |
| 80                                    |        | R.LTGFHETSININDFSAGVANR.G        | 2150.03 | 3 | 0.009  | 0.67 | 2.932 | 0.533 | 311.4  |
| 84                                    |        | -.RPSANCDPYAVTEAIVR.-            | 1918.94 | 3 | 0.007  | 0.70 | 2.705 | 0.455 | 542.6  |
| 106                                   |        | R.LTGFHETSININDFSAGVANR.G        | 2150.03 | 3 | 0.002  | 0.81 | 3.342 | 0.551 | 445.3  |
| Hemoglobin subunit beta               | P02088 |                                  |         |   | 5e-008 | 2.4  | 30.1  | 0.0   | 0      |
| 4                                     |        | K.DFTPAAQAAFQK.V                 | 1294.64 | 2 | 6e-005 | 0.81 | 2.543 | 0.430 | 478.6  |
| 12                                    |        | K.DFTPAAQAAFQK.V                 | 1294.64 | 2 | 0.0005 | 0.71 | 2.485 | 0.434 | 353.8  |
| 21                                    |        | K.DFTPAAQAAFQK.V                 | 1294.64 | 2 | 0.0003 | 0.67 | 2.502 | 0.441 | 312.8  |
| 22                                    |        | K.VNSDEVGGEALGR.L                | 1302.63 | 2 | 6e-008 | 0.93 | 2.993 | 0.463 | 1123.7 |
| 30                                    |        | K.VNSDEVGGEALGR.L                | 1302.63 | 2 | 2e-007 | 0.78 | 2.146 | 0.500 | 698.8  |
| 31                                    |        | K.DFTPAAQAAFQK.V                 | 1294.64 | 2 | 0.0003 | 0.76 | 2.245 | 0.487 | 404.8  |
| 39                                    |        | K.DFTPAAQAAFQK.V                 | 1294.64 | 2 | 1e-005 | 0.74 | 2.459 | 0.389 | 431.1  |
| 42                                    |        | K.VNSDEVGGEALGR.L                | 1302.63 | 2 | 9e-007 | 0.92 | 2.846 | 0.459 | 1121.7 |
| 47                                    |        | K.VNSDEVGGEALGR.L                | 1302.63 | 2 | 5e-008 | 0.94 | 2.783 | 0.452 | 1461.2 |
| 88                                    |        | K.VVAGVATALAHK.Y                 | 1136.68 | 2 | 0.0003 | 0.75 | 2.336 | 0.535 | 432.8  |
| 116                                   |        | K.VVAGVATALAHK.Y                 | 1136.68 | 2 | 3e-006 | 0.72 | 2.461 | 0.429 | 476.1  |
| 124                                   |        | K.VVAGVATALAHK.Y                 | 1136.68 | 2 | 0.001  | 0.54 | 2.170 | 0.494 | 273.1  |
| 133                                   |        | K.VVAGVATALAHK.Y                 | 1136.68 | 2 | 6e-005 | 0.71 | 2.398 | 0.597 | 248.5  |
| Peptidyl-prolyl cis-trans isomerase A | P17742 |                                  |         |   | 2e-005 | 1.6  | 18.1  | 0.0   | 0      |
| 13                                    |        | R.VSFELFADK.V                    | 1055.54 | 2 | 0.0002 | 0.55 | 2.044 | 0.369 | 310.0  |
| 21                                    |        | R.VSFELFADK.V                    | 1055.54 | 2 | 0.0009 | 0.55 | 2.059 | 0.209 | 436.8  |
| 23                                    |        | -.FEDENFILK.-                    | 1154.57 | 2 | 0.001  | 0.76 | 2.409 | 0.220 | 444.0  |
| 31                                    |        | R.VSFELFADK.V                    | 1055.54 | 2 | 2e-005 | 0.85 | 2.632 | 0.218 | 683.5  |
| 41                                    |        | R.VSFELFADK.V                    | 1055.54 | 2 | 0.002  | 0.72 | 2.445 | 0.183 | 600.7  |
| Alpha-enolase                         | P17182 |                                  |         |   | 7e-008 | 5.1  | 74.2  | 0.0   | 0      |
| 18                                    |        | R.GNPTVEVDLYTAK.G                | 1406.72 | 2 | 2e-007 | 0.74 | 3.025 | 0.203 | 318.6  |
| 28                                    |        | R.GNPTVEVDLYTAK.G                | 1406.72 | 2 | 7e-008 | 0.75 | 3.048 | 0.138 | 359.1  |
| 50                                    |        | R.GNPTVEVDLYTAK.G                | 1406.72 | 2 | 2e-006 | 0.70 | 3.024 | 0.136 | 323.2  |
| 53                                    |        | -.IDKLM*IEM*DG TENK.-            | 1668.78 | 3 | 0.0004 | 0.89 | 3.627 | 0.533 | 562.4  |
| 58                                    |        | R.GNPTVEVDLYTAK.G                | 1406.72 | 2 | 1e-007 | 0.74 | 3.038 | 0.206 | 319.5  |
| 59                                    |        | -.IDKLM*IEM*DG TENK.-            | 1668.78 | 3 | 0.0005 | 0.83 | 3.069 | 0.448 | 603.3  |
| 66                                    |        | R.GNPTVEVDLYTAK.G                | 1406.72 | 2 | 1e-006 | 0.69 | 2.944 | 0.224 | 276.4  |



|     |                           |         |   |        |      |       |       |       |
|-----|---------------------------|---------|---|--------|------|-------|-------|-------|
| 69  | -.IDKLM*IEM*DG TENK.-     | 1668.78 | 3 | 0.002  | 0.90 | 3.548 | 0.567 | 648.8 |
| 76  | -.IDKLM*IEM*DG TENK.-     | 1668.78 | 3 | 0.006  | 0.93 | 3.684 | 0.590 | 828.5 |
| 80  | K.GVSQAVEHINK.T           | 1181.63 | 2 | 1e-005 | 0.94 | 3.336 | 0.526 | 946.9 |
| 84  | -.IDKLM*IEM*DG TENK.-     | 1668.78 | 3 | 0.0006 | 0.89 | 3.345 | 0.560 | 683.3 |
| 90  | K.GVSQAVEHINK.T           | 1181.63 | 2 | 0.0003 | 0.90 | 2.928 | 0.467 | 686.9 |
| 95  | K.GVSQAVEHINK.T           | 1181.63 | 2 | 0.0001 | 0.90 | 2.987 | 0.409 | 796.1 |
| 98  | -.LM*IEM*DG TENK.-        | 1312.58 | 2 | 0.01   | 0.50 | 2.170 | 0.211 | 207.9 |
| 106 | K.GVSQAVEHINK.T           | 1181.63 | 2 | 0.001  | 0.82 | 2.876 | 0.410 | 517.2 |
| 109 | K.LAM*QEFM*ILPVGASSFR.E   | 1928.96 | 3 | 0.002  | 0.60 | 3.260 | 0.203 | 434.3 |
| 111 | K.GVSQAVEHINK.T           | 1181.63 | 2 | 4e-006 | 0.87 | 2.863 | 0.437 | 647.5 |
| 113 | -.LM*IEM*DG TENK.-        | 1312.58 | 2 | 0.03   | 0.52 | 2.098 | 0.247 | 225.8 |
| 117 | K.LAM*QEFM*ILPVGASSFR.E   | 1928.96 | 3 | 0.03   | 0.47 | 2.540 | 0.153 | 506.7 |
| 121 | -.LM*IEM*DG TENK.-        | 1312.58 | 2 | 0.008  | 0.56 | 2.231 | 0.258 | 233.1 |
| 127 | R.SGKYDLDFK.S             | 1072.53 | 3 | 0.05   | 0.75 | 2.725 | 0.351 | 569.6 |
| 130 | K.LAM*QEFM*ILPVGASSFR.E   | 1928.96 | 3 | 0.004  | 0.45 | 2.677 | 0.149 | 487.4 |
| 136 | -.LAM*QEFM*ILPVGASSFR.-   | 1928.96 | 2 | 0.0007 | 0.19 | 2.670 | 0.568 | 216.0 |
| 139 | K.LAM*QEFM*ILPVGASSFR.E   | 1928.96 | 3 | 0.0004 | 0.64 | 3.067 | 0.124 | 625.3 |
| 213 | K.AGYTDQVVIGM*DVAASEFYR.S | 2208.03 | 2 | 0.003  | 0.54 | 2.571 | 0.519 | 208.2 |
| 225 | K.AGYTDQVVIGM*DVAASEFYR.S | 2208.03 | 2 | 0.004  | 0.45 | 2.248 | 0.444 | 256.2 |
| 263 | K.AGYTDQVVIGM*DVAASEFYR.S | 2208.03 | 2 | 2e-005 | 0.46 | 2.341 | 0.500 | 203.5 |

Pyruvate kinase isozymes M1/M2

P52480

|         |                         |         |   |        |      |       |       |        |
|---------|-------------------------|---------|---|--------|------|-------|-------|--------|
|         |                         |         |   | 4e-008 | 8.2  | 100.2 | 0.0   | 0      |
| 6       | R.LDIDSAPITAR.N         | 1171.63 | 2 | 0.01   | 0.84 | 2.850 | 0.373 | 625.3  |
| 8       | R.VNLAM*DV GK.A         | 962.50  | 2 | 0.0002 | 0.88 | 2.487 | 0.516 | 644.4  |
| 16      | R.LDIDSAPITAR.N         | 1171.63 | 2 | 0.0006 | 0.86 | 2.848 | 0.402 | 664.8  |
| 17      | R.VNLAM*DV GK.A         | 962.50  | 2 | 2e-005 | 0.93 | 2.775 | 0.451 | 913.8  |
| 18      | R.RFDEILEASDGIM*VAR.G   | 1837.91 | 3 | 2e-005 | 0.93 | 4.125 | 0.436 | 1077.3 |
| 25      | R.LDIDSAPITAR.N         | 1171.63 | 2 | 0.001  | 0.90 | 3.111 | 0.441 | 736.4  |
| 26      | R.VNLAM*DV GK.A         | 962.50  | 2 | 0.0003 | 0.93 | 2.962 | 0.507 | 817.2  |
| 27      | R.RFDEILEASDGIM*VAR.G   | 1837.91 | 3 | 1e-006 | 0.94 | 4.236 | 0.381 | 1266.4 |
| 34      | R.LDIDSAPITAR.N         | 1171.63 | 2 | 0.0005 | 0.92 | 3.301 | 0.413 | 821.3  |
| 35      | R.VNLAM*DV GK.A         | 962.50  | 2 | 4e-005 | 0.93 | 2.878 | 0.392 | 923.9  |
| 36      | R.RFDEILEASDGIM*VAR.G   | 1837.91 | 3 | 3e-006 | 0.93 | 4.410 | 0.495 | 827.9  |
| 43      | R.LDIDSAPITAR.N         | 1171.63 | 2 | 0.0002 | 0.93 | 3.314 | 0.463 | 801.0  |
| 44      | R.VNLAM*DV GK.A         | 962.50  | 2 | 0.0001 | 0.92 | 2.708 | 0.515 | 834.3  |
| 45 - 47 | R.RFDEILEASDGIM*VAR.G   | 1837.91 | 3 | 7e-006 | 0.96 | 4.790 | 0.458 | 1260.1 |
| 49      | K.KGVNLPGA AVDLPAVSEK.D | 1764.99 | 3 | 0.003  | 0.82 | 3.029 | 0.428 | 780.9  |
| 56      | K.KGVNLPGA AVDLPAVSEK.D | 1764.99 | 3 | 0.007  | 0.67 | 3.071 | 0.378 | 438.2  |
| 60      | K.GVNLPGA AVDLPAVSEK.D  | 1636.89 | 2 | 4e-007 | 0.92 | 3.646 | 0.563 | 598.2  |
| 61      | K.IYVDDGLISLQVK.Q       | 1462.82 | 2 | 4e-008 | 0.96 | 3.881 | 0.317 | 1622   |
| 66      | K.KGVNLPGA AVDLPAVSEK.D | 1764.99 | 3 | 0.0002 | 0.79 | 3.101 | 0.408 | 669.0  |
| 68      | K.IYVDDGLISLQVK.Q       | 1462.82 | 2 | 6e-006 | 0.94 | 3.789 | 0.279 | 1150.4 |
| 70      | K.GVNLPGA AVDLPAVSEK.D  | 1636.89 | 2 | 1e-006 | 0.88 | 3.185 | 0.602 | 461.5  |

|     |                             |         |   |        |      |       |       |        |
|-----|-----------------------------|---------|---|--------|------|-------|-------|--------|
| 77  | K.IYVDDGLISLQVK.Q           | 1462.82 | 2 | 6e-007 | 0.96 | 4.323 | 0.378 | 1426.8 |
| 80  | K.GVNLPGAAVDLPVSEK.D        | 1636.89 | 2 | 4e-007 | 0.92 | 3.552 | 0.653 | 556.7  |
| 83  | K.KGVNLPGAAVDLPVSEK.D       | 1764.99 | 3 | 0.004  | 0.72 | 3.249 | 0.353 | 487.9  |
| 85  | K.IYVDDGLISLQVK.Q           | 1462.82 | 2 | 1e-006 | 0.96 | 4.018 | 0.302 | 1511.7 |
| 86  | K.GVNLPGAAVDLPVSEK.D        | 1636.89 | 2 | 1e-005 | 0.85 | 3.326 | 0.538 | 422.4  |
| 89  | R.EATESFASDPILYRPVAVALDTK.G | 2493.29 | 3 | 0.001  | 0.47 | 2.776 | 0.436 | 150.4  |
| 92  | K.IYVDDGLISLQVK.Q           | 1462.82 | 2 | 8e-008 | 0.97 | 4.051 | 0.441 | 1904.7 |
| 95  | K.GVNLPGAAVDLPVSEK.D        | 1636.89 | 2 | 5e-007 | 0.93 | 4.065 | 0.564 | 637.8  |
| 98  | R.AGKPVICATQM*LESM*IK.K     | 1908.96 | 3 | 0.01   | 0.85 | 3.821 | 0.448 | 534.8  |
| 113 | R.AGKPVICATQM*LESM*IK.K     | 1908.96 | 3 | 0.0002 | 0.74 | 3.293 | 0.451 | 344.5  |
| 120 | R.AGKPVICATQM*LESM*IK.K     | 1908.96 | 3 | 0.003  | 0.70 | 3.047 | 0.397 | 436.3  |
| 125 | R.PVAVALDTK.G               | 913.54  | 2 | 0.001  | 0.80 | 2.820 | 0.180 | 599.6  |
| 131 | R.AGKPVICATQM*LESM*IK.K     | 1908.96 | 3 | 0.009  | 0.75 | 3.149 | 0.469 | 417.5  |
| 135 | R.PVAVALDTK.G               | 913.54  | 2 | 0.04   | 0.63 | 2.045 | 0.330 | 446.6  |
| 141 | R.PVAVALDTK.G               | 913.54  | 2 | 0.002  | 0.66 | 2.237 | 0.213 | 464.9  |
| 143 | R.EATESFASDPILYR.P          | 1598.77 | 2 | 0.0006 | 0.24 | 2.047 | 0.351 | 233.4  |
| 147 | R.PVAVALDTK.G               | 913.54  | 2 | 0.01   | 0.47 | 2.159 | 0.267 | 305.6  |
| 156 | R.PVAVALDTK.G               | 913.54  | 2 | 0.01   | 0.45 | 2.178 | 0.239 | 318.0  |
| 174 | R.EATESFASDPILYR.P          | 1598.77 | 2 | 6e-006 | 0.74 | 2.398 | 0.574 | 496.6  |
| 194 | K.KGVNLPGAAVDLPVSEK.D       | 1764.99 | 2 | 0.002  | 0.33 | 2.209 | 0.423 | 197.9  |
